# Supplementary material for: SPHK/HIF-1α Signaling Pathway Has a Critical Role in Chrysin-Induced Anticancer Activity in Hypoxia-Induced PC-3 Cells
Source: MDPI journal article supplement (doi:10.3390/cells11182787), 2022-09-07
Supplement: s1 [file s1]

## SUPPLEMENTARY FIGURES and LEGENDS

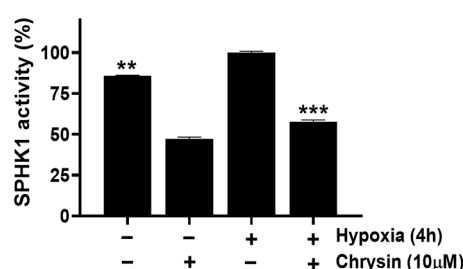

**Figure S1.** Effect of chrysin on the SPHK-1 activity in normoxic or hypoxic PC-3 cells. Cells were treated with 10  $\mu$ M chrysin for 4 h under normoxia and hypoxia. Sphingosine kinase activity was measured by using sphingosine kinase activity assay kit (Cat: K-3500, Echelon, Salt Lake City, UT, USA) according to the manufacturer's instructions. In brief, protein extracts (30  $\mu$ g) were incubated in reaction buffer (100  $\mu$ M sphingosine and 10  $\mu$ M ATP) for 1 h at 37  $^{\circ}$ C, and luminescence attached ATP detector was added to stop the kinase reaction. Kinase activity was measured using Lumistar Optima luminometer (BMG LABTECH, Offenburg, Germany). Quantitative SPHK-1 activity levels are shown in bar graphs as mean  $\pm$  SD for the duplicate. \*\* $p$  < 0.01 and \*\*\* $p$  < 0.001 compared hypoxia control.

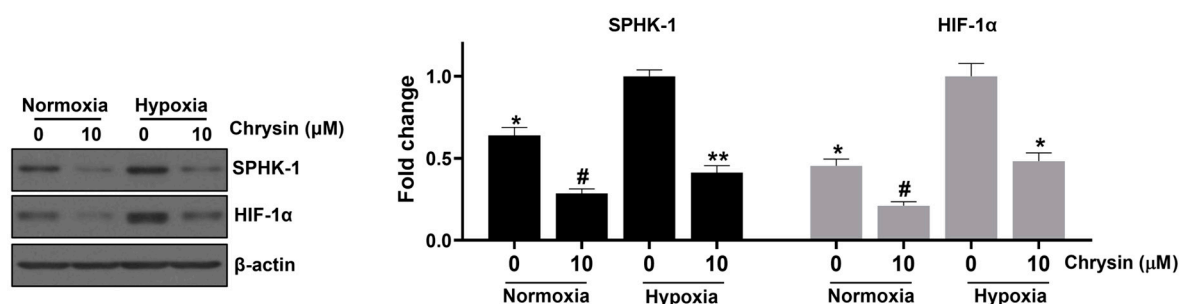

**Figure S2.** Representative western blot images and relative densitometric bar graphs of SPHK-1 and HIF-1 $\alpha$ . Chrysin decreases SPHK-1 and HIF-1 $\alpha$  in hypoxic or normoxic DU145 cells. The DU145 cells were cultured in RPMI 1640 medium supplemented with 10% fetal bovine serum and 1% antibiotics. DU145 cells ( $5 \times 10^5$  cells/well) were seeded in a 60 mm cell culture dish and treated with chrysin (10  $\mu$ M) under normoxic or hypoxic conditions for 24 h. Cell lysates were prepared and subjected to western blotting to analyze the expression of SPHK-1, HIF-1 $\alpha$ , and  $\beta$ -actin. Bar graphs represent the quantification of interest protein related to  $\beta$ -actin and present as a fold change of control. \* $p$  < 0.05 and \*\* $p$  < 0.01 when compared to the hypoxia control. # $p$  < 0.05 is value when compared to normoxia control.

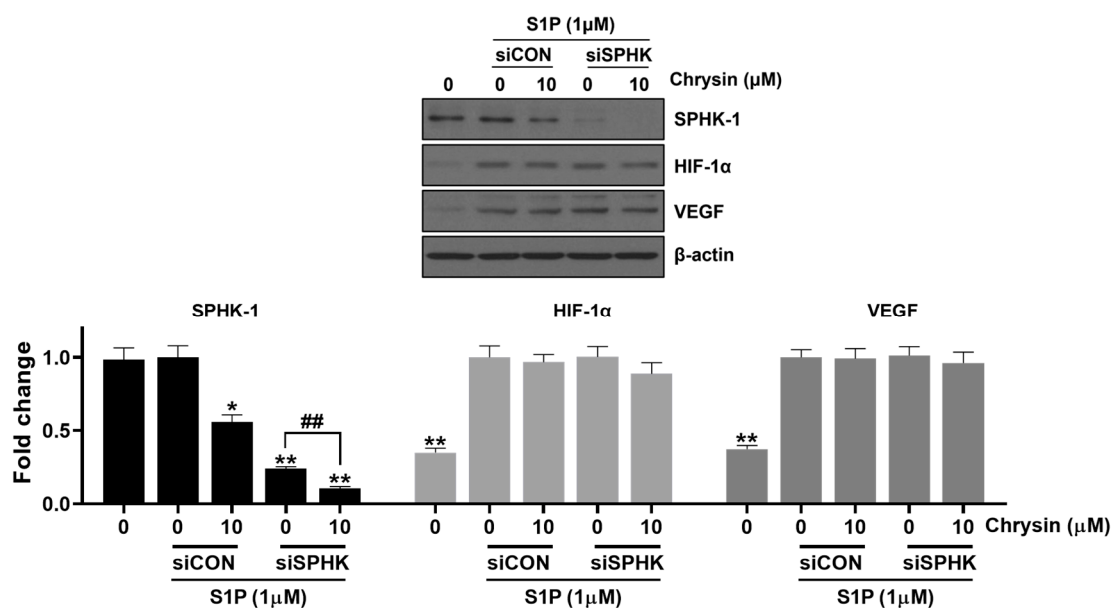

**Figure S3.** Effect of chrysin on SPHK-1, HIF-1 $\alpha$ , and VEGF in S1P- induced PC-3 cells. Representative western blot images and relative densitometric bar graphs of SPHK-1, HIF-1 $\alpha$ , and VEGF. The cells were treated with S1P(1 $\mu$ M) or chrysin (10 $\mu$ M) for 24h after transfection SPHK-1 siRNA (48 h). Cell lysates were prepared and subjected to western blotting to analyze the expression of SPHK-1, HIF-1 $\alpha$ , VEGF, and  $\beta$ -actin. Bar graphs represent the quantification of interest protein related to  $\beta$ -actin, as fold change of control. \* $p$  < 0.05 and \*\* $p$  < 0.01 are values when compared with S1P control. ## $p$  < 0.01 is value when compared with SPHK1 siRNA(siSPHK) control.
